# Supplementary material for: The Risk of Psychological Stress on Cancer Recurrence: A Systematic Review
Source: MDPI journal article supplement (doi:10.3390/cancers13225816), 2021-11-19
Supplement: s1 [file s1]

# Supplementary Materials: The Risk of Psychological Stress on Cancer Recurrence: A Systematic Review

Hyeon-Muk Oh and Chang-Gue Son

**Supplementary Table S1.** Newcastle-Ottawa scale for observational studies and Risk of Bias tool (RoB 2.0) for RCTs.

| <b>Newcastle-Ottawa scale for observational studies</b> |           |   |   |               |    |   |         |   |       |
|---------------------------------------------------------|-----------|---|---|---------------|----|---|---------|---|-------|
| Study                                                   | Selection |   |   | Comparability |    |   | Outcome |   | Total |
|                                                         | A         | B | C | D             | E  | F | G       | H |       |
| Groenvold et al. (2007) [28]                            | *         | * | * | -             | ** | * | *       | * | 7     |
| Saquib et al. (2011) [29]                               | *         | * | - | -             | ** | * | *       | * | 6     |
| Olsen et al. (2012) [30]                                | *         | * | * | -             | ** | * | *       | * | 7     |
| Liu et al. (2016) [31]                                  | *         | * | - | -             | ** | * | *       | * | 6     |

<sup>a</sup>A: Representativeness of the exposed cohort; B: Selection of the nonexposed cohort; C: Ascertainment of cohort; D: Demonstration that outcome of interest not present at the start of the study; E: Comparability of cohort; F: Assessment of outcome; G: Follow-upped long enough until outcomes occur.

<sup>b</sup>The stars (\*) are awarded for meeting each criterion. A maximum of one star for item within the Selection and Outcome categories and maximum of two stars can be given for Comparability.

| <b>Risk of bias tool (RoB 2.0) for RCTs</b> |                                             |                                                    |                                  |                                    |                                          |
|---------------------------------------------|---------------------------------------------|----------------------------------------------------|----------------------------------|------------------------------------|------------------------------------------|
| Study                                       | Bias arising from the randomization process | Bias due to deviations from intended interventions | Bias due to missing outcome data | Bias in measurement of the outcome | Bias in selection of the reported result |
| Andersen et al. (2008) [32]                 | Some concerns                               | Low                                                | Low                              | Low                                | Low                                      |
| Stagl et al. (2015) [33]                    | Some concerns                               | Low                                                | Low                              | Low                                | Low                                      |
